# Supplementary material
Source: MDPI journal article supplement (https://www.mdpi.com/2073-4441/13/22/3302)
Supplement: s1 [file s1 › water-1460323-supplementary.pdf]

# Removal of Various Hazardous Materials Using a Multifunctional Biomass-Derived Hydroxyapatite (HAP) Catalyst and Its Antibacterial Effects

Sanha Jang <sup>1</sup>, Kyeongmun Park <sup>1</sup>, Sehwan Song <sup>2</sup>, Haksoo Lee <sup>3</sup>, Sungkyun Park <sup>2</sup>, BuHyun Youn <sup>3,\*</sup>, Kang Hyun Park <sup>1,4,\*</sup>

<sup>1</sup> Department of Chemistry, Pusan National University, Busandaehak-ro 63beon-gil, Geumjeong-gu, Busan, 46241, Korea; jangs0522@naver.com (S.J.); pkmkm951@naver.com (K.P.)

<sup>2</sup> Department of Physics, Pusan National University, Busandaehak-ro 63beon-gil, Geumjeong-gu, Busan, 46241, Korea; sehwan song465@gmail.com (S.S.)

<sup>3</sup> Department of Biological Sciences, Pusan National University, Busandaehak-ro 63beon-gil, Geumjeong-gu, Busan, 46241, Korea; hs950303@gmail.com (H.L.)

<sup>4</sup> SoulDot Co., Ltd, Pusan National University, Busandaehak-ro 63beon-gil, Geumjeong-gu, Busan 46241, Korea

\* Correspondence: bhyoun72@pusan.ac.kr (B.Y.); Tel.: +82-51-510-2264, and chemistry@pusan.ac.kr (K.H.P.) Tel.: +82-51-510-2238

## Table of Contents:

|                                                                                                |    |
|------------------------------------------------------------------------------------------------|----|
| Scheme S1. Schematic image of antibacterial tests using Gram negative and Gram positive.....   | S1 |
| Figure S1. Histogram of South Korean fishery production and byproducts.....                    | S2 |
| Figure S2. Oyster shells that have not been treated in South Korea.....                        | S3 |
| Figure S3. HAADF-STEM image and elemental mapping images of CaO .....                          | S4 |
| Figure S4. XPS spectra of CaO and HAP.....                                                     | S5 |
| Table S1. ICP data table for RT conditions of various metal cation adsorption.....             | S6 |
| Table S2. ICP data table for various acidic condition of various metal cation adsorption.....  | S7 |
| Table S3. Calculation of antibacterial efficiency of <i>E. coli</i> and <i>S. aureus</i> ..... | S8 |

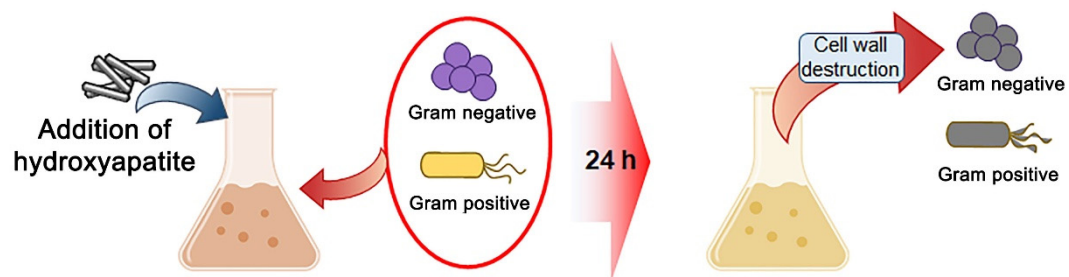

**Scheme S1.** Schematic image of antibacterial tests using Gram negative and Gram positive, respectively.

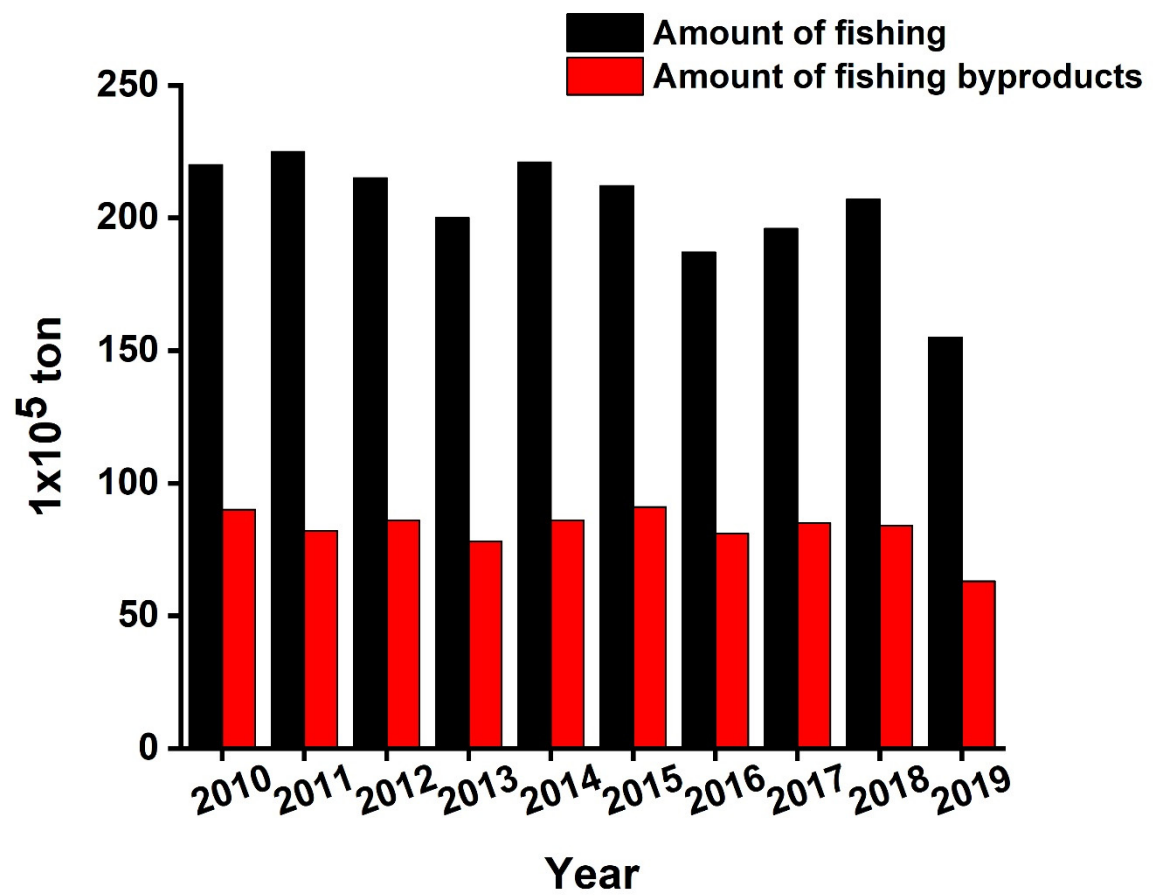

**Figure S1.** Histogram of South Korean fishery production and byproducts [44].

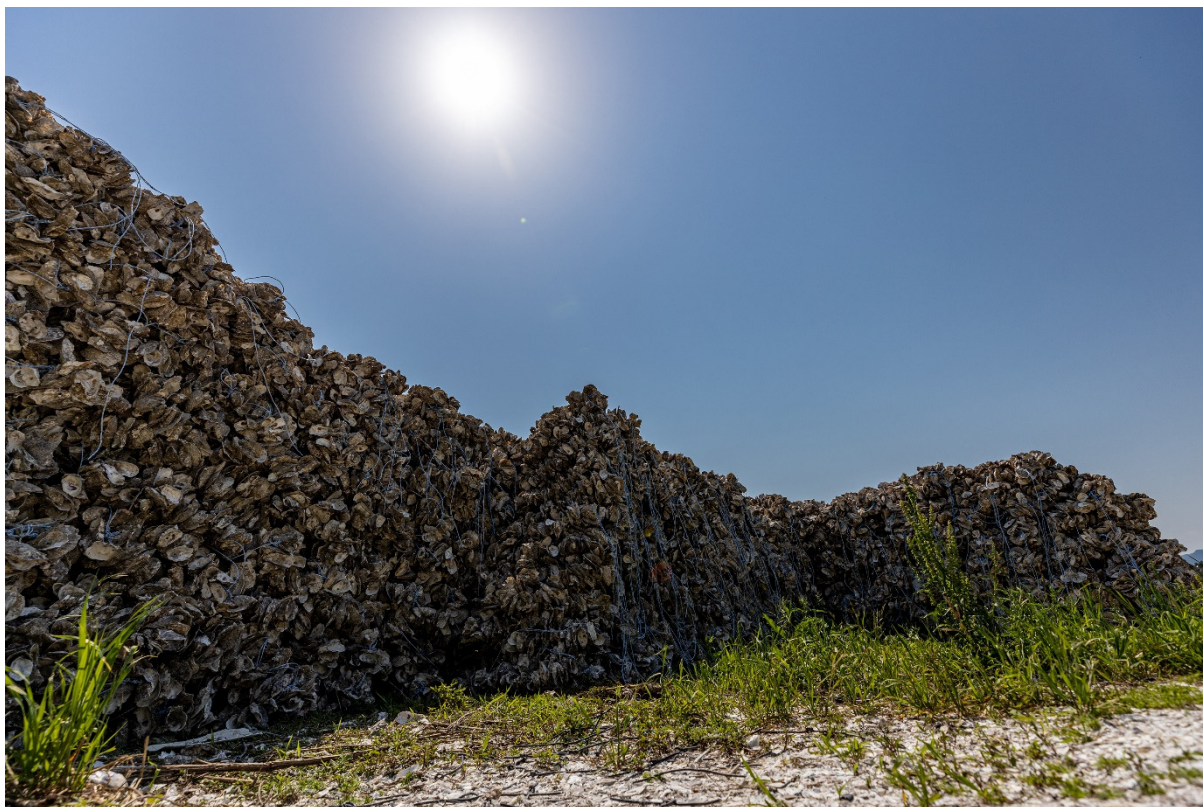

**Figure S2.** Oyster shells that have not been treated in South Korea. The photo was taken by Sanha Jang.

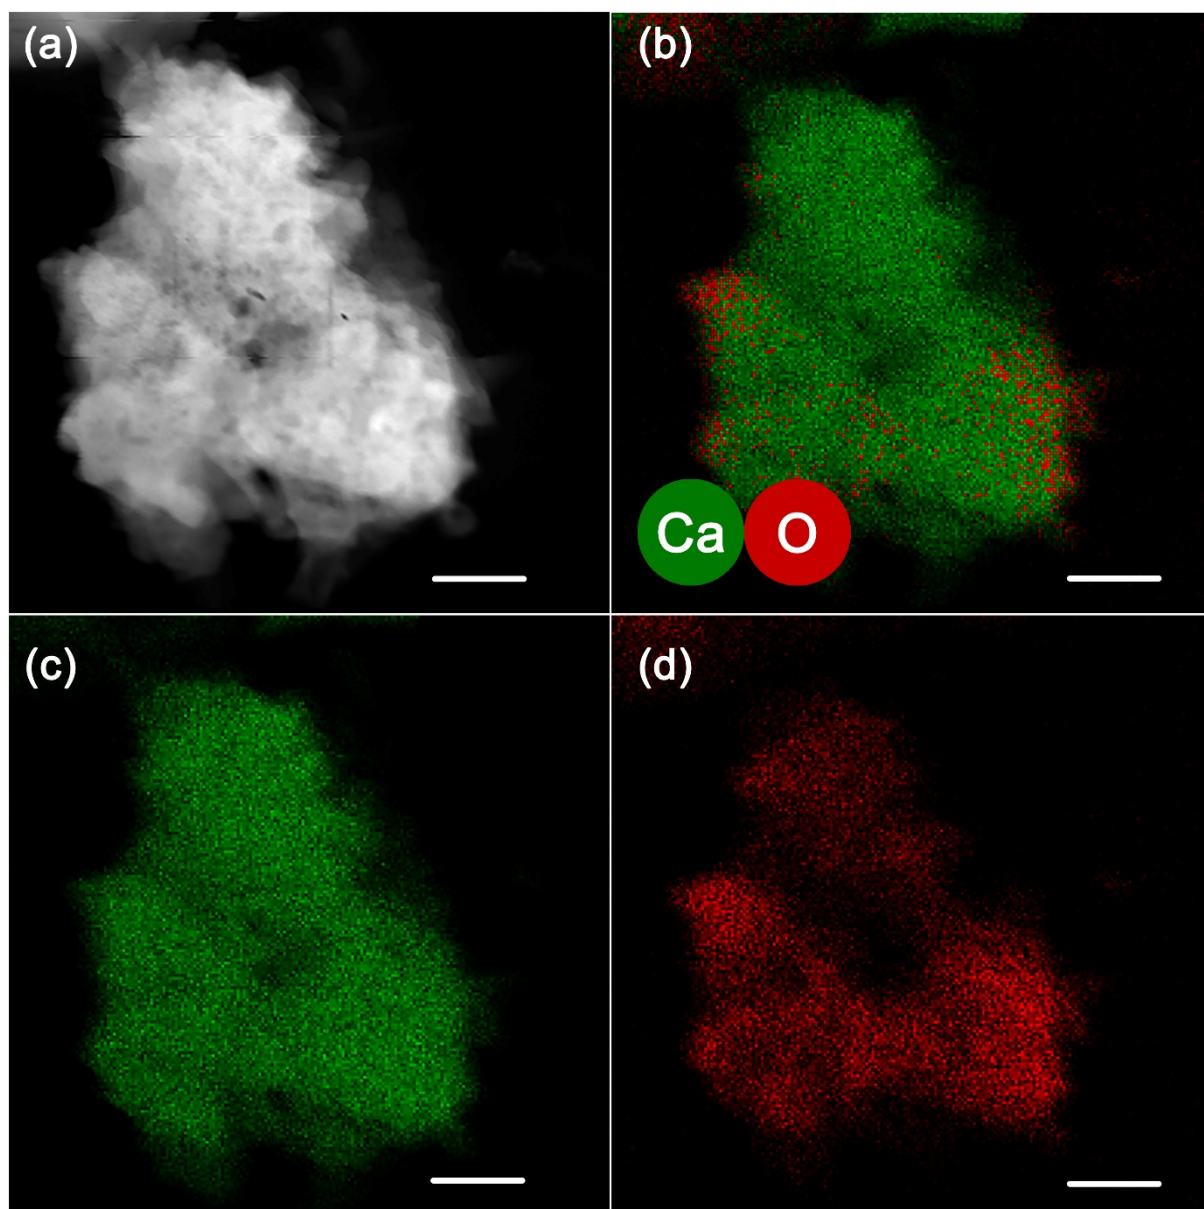

**Figure S3.** (a) HAADF-STEM image of CaO and (b-d) elemental mapping images of CaO. The bars indicate 100 nm, respectively.

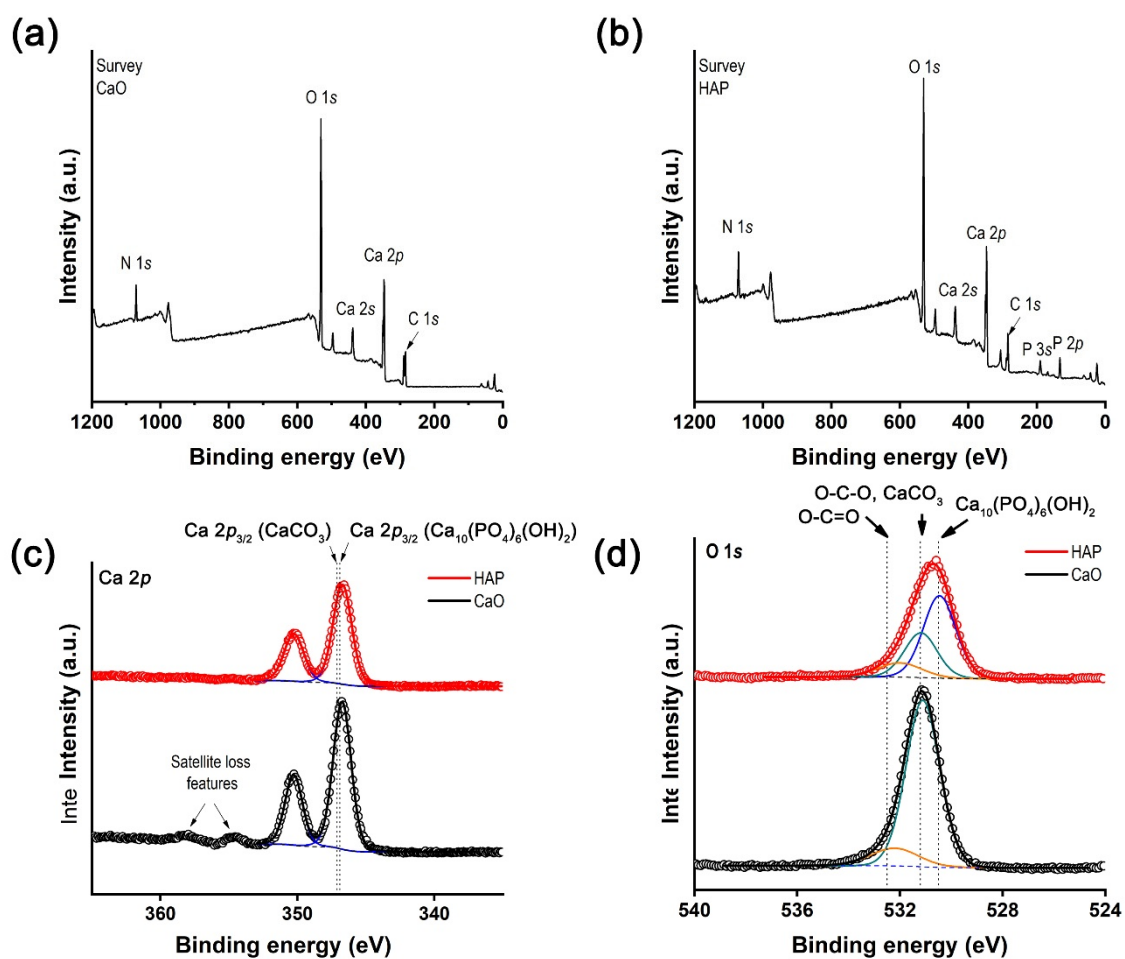

**Figure S4.** Survey spectrum of (a) CaO and (b) HAP powders and deconvoluted (c) Ca 2p and (d) O 1s spectrum. The vertical dotted lines indicate the reference binding energy.

**Table S1.** ICP data table for RT condition of various metal cation adsorption

|                                    | Cr     | Mn    | Ni    | Cu     | Cd    | Ba     | Pb     |
|------------------------------------|--------|-------|-------|--------|-------|--------|--------|
| <b>Initial concentration (ppm)</b> | 115.39 | 85.44 | 98.47 | 112.60 | 99.63 | 114.79 | 103.52 |
| <b>Final concentration (ppm)</b>   | 48.56  | 28.80 | 61.89 | 79.78  | 26.03 | 64.25  | 7.49   |
| <b>RSD (%)</b>                     | 0.75   | 1.90  | 0.54  | 0.38   | 0.95  | 1.02   | 5.30   |
| <b>Removal efficiency (%)</b>      | 57.9   | 66.3  | 37.1  | 29.1   | 73.9  | 44.0   | 92.8   |

**Table S2.** ICP data table for various acidic condition of various metal cation adsorption

|                                       | Cr   |       |       | Cd   |       |       | Pb    |      |      |
|---------------------------------------|------|-------|-------|------|-------|-------|-------|------|------|
|                                       | pH7  | pH5   | pH4   | pH7  | pH5   | pH4   | pH7   | pH5  | pH4  |
| <b>Final concentration (ppm)</b>      | 0.33 | 64.26 | 63.63 | 0    | 84.08 | 35.74 | 13.68 | 4.52 | 7.91 |
| <b>RSD (%)</b>                        | 2.12 | 0.80  | 2.28  | 0.65 | 2.65  | 0.73  | 3.97  | 1.30 | 1.87 |
| <b>Average removal efficiency (%)</b> | 63.0 |       |       | 59.9 |       |       | 91.6  |      |      |

**Table S3.** Calculation of antibacterial efficiency of *E. coli* and *S. aureus* for 24 h

|                             | Antibacterial efficiency (%) |                  |
|-----------------------------|------------------------------|------------------|
| <b>Concentration of HAP</b> | <i>E. coli</i>               | <i>S. aureus</i> |
| <b>5 mM</b>                 | 74.4                         | 78.1             |
| <b>10 mM</b>                | 89.6                         | 96.0             |
